# Supplementary material
Source: publisher figshare collection journal article supplement (https://acs.figshare.com/ndownloader/files/3807775)
Supplement: Supplementary file 1 [file 3807775]

## Supplementary Information

### Remarkably Improved Hydrogen Storage Performance of $\text{MgH}_2$ Catalyzed by Multivalence $\text{NbH}_x$ Nanoparticles

Liuting Zhang, Xuezhong Xiao\*, Chenchen Xu, Jianguang Zheng, Xiulin Fan, Jie Shao, Shouquan Li, Hongwei Ge, Qidong Wang and Lixin Chen\*

State Key Laboratory of Silicon Materials, Key Laboratory of Advanced Materials and Applications for Batteries of Zhejiang Province, School of Materials Science and Engineering, Zhejiang University, Hangzhou 310027, China

Table S1. Kinetic models examined in the isothermal desorption curves of nanoconfined samples

| Symbol | Model                                                           | Integral $f(\alpha)$ form          |
|--------|-----------------------------------------------------------------|------------------------------------|
| D1     | one-dimensional diffusion                                       | $\alpha^2$                         |
| D2     | two-dimensional diffusion                                       | $\alpha + (1-\alpha)\ln(1-\alpha)$ |
| D3     | three-dimensional diffusion<br>(Jander equation)                | $[1-(1-\alpha)^{1/3}]^2$           |
| D4     | three-dimensional diffusion<br>(Ginstling-Braunshtein equation) | $(1-2\alpha/3)-(1-\alpha)^{2/3}$   |
| F1     | First-order reaction                                            | $-\ln(1-\alpha)$                   |
| R2     | two-dimensional phase boundary                                  | $1-(1-\alpha)^{1/2}$               |
| R3     | three-dimensional phase boundary                                | $1-(1-\alpha)^{1/3}$               |
| A2     | Avrami-Erofe'ev                                                 | $[-\ln(1-\alpha)]^{1/2}$           |
| A3     | Avrami-Erofe'ev                                                 | $[-\ln(1-\alpha)]^{1/3}$           |

#### Synthesis of $\text{NbH}_x$ nanoparticles

Mechanochemical synthesis is a wide used technique that employs ion exchange reaction during ball milling.<sup>1</sup> This method has been used recently to synthesize  $\text{AlH}_3$ <sup>2</sup> and  $\text{MgH}_2$ <sup>3,4</sup>. Usually a reaction byproduct phase is also formed and added during milling to separate the desired reaction

\* Corresponding author. Tel./fax: +86 571 8795 1152.

E-mail address: xzxiao@zju.edu.cn (X.Z. Xiao); lxchen@zju.edu.cn (L.X. Chen).

product and the variation in the microstructure of the synthesized product can be obtained as a function of the quantity of byproduct used as a reaction buffer. Thus, we apply this method to synthesis nano-sized  $\text{NbH}_x$  through iron exchange reaction during ball milling. Mass Spectrometry (MS) measurement of gas inside the jar after ball milling was carried out on a QIC-20 (HIDEN ANALYTICAL LTD) gas analysis system. The results are presented in Figure S1, which shows that only hydrogen is released. Also, the colour of the reagents turned from yellow to black after ball milling, indicating  $\text{LiH}$  and  $\text{NbCl}_5$  reacted in the ball milling process. Furthermore, the mixture after ball milling was tested by XRD. Figure S2 reveals that  $\text{NbH}$  and  $\text{LiCl}$  were the only phases detected, indicating that  $\text{LiH}$  and  $\text{NbCl}_5$  were completely reacted in the ball milling process. Moreover, Figure 1 shows that other Nb-based Hydride ( $\text{NbH}_{2.7}$ ) formed in the ball milling process. Thus, the synthesis process was proceeding according to the following equation:

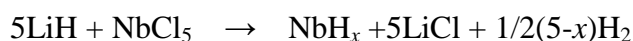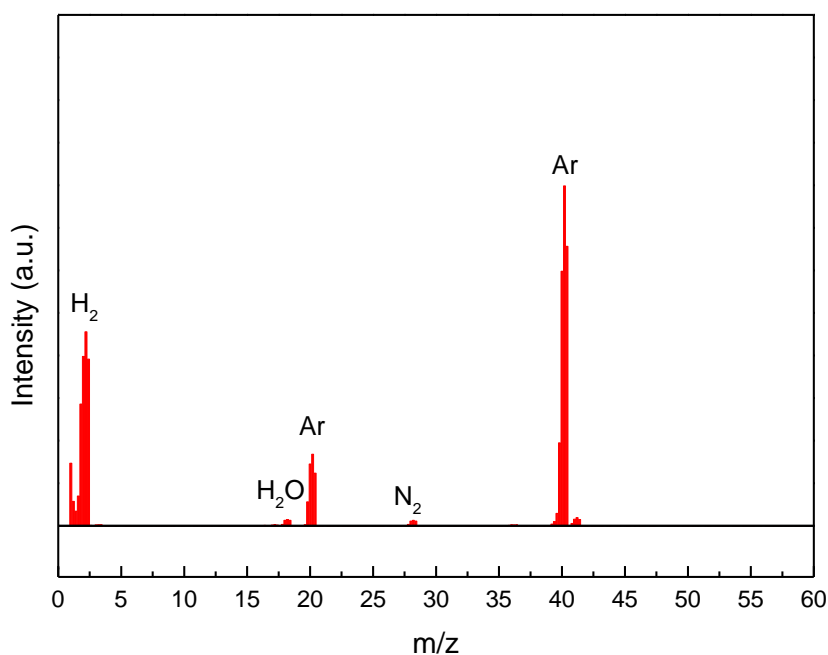

Figure S1. MS profile of gas inside the jar after ball milling  $\text{LiH}$  and  $\text{NbCl}_5$  for 5h (Ar was the protecting gas and  $\text{H}_2\text{O}$  and  $\text{N}_2$  were remaining gas inside the pipe of QIC-20).

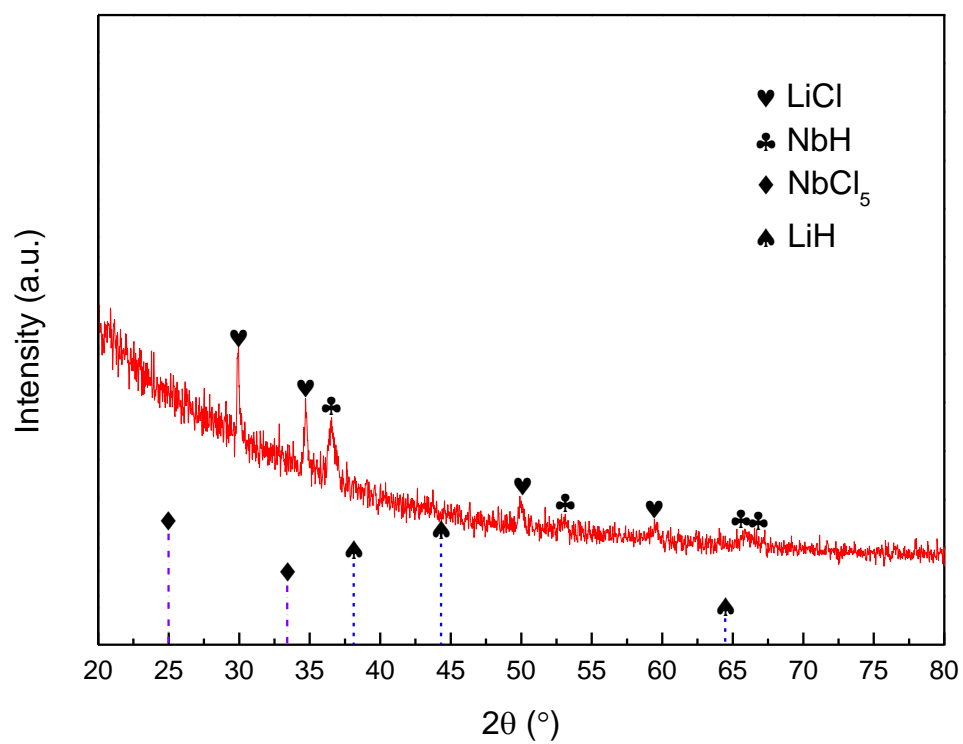

Figure S2. XRD of products inside the jar after ball milling LiH and NbCl<sub>5</sub> for 20h.

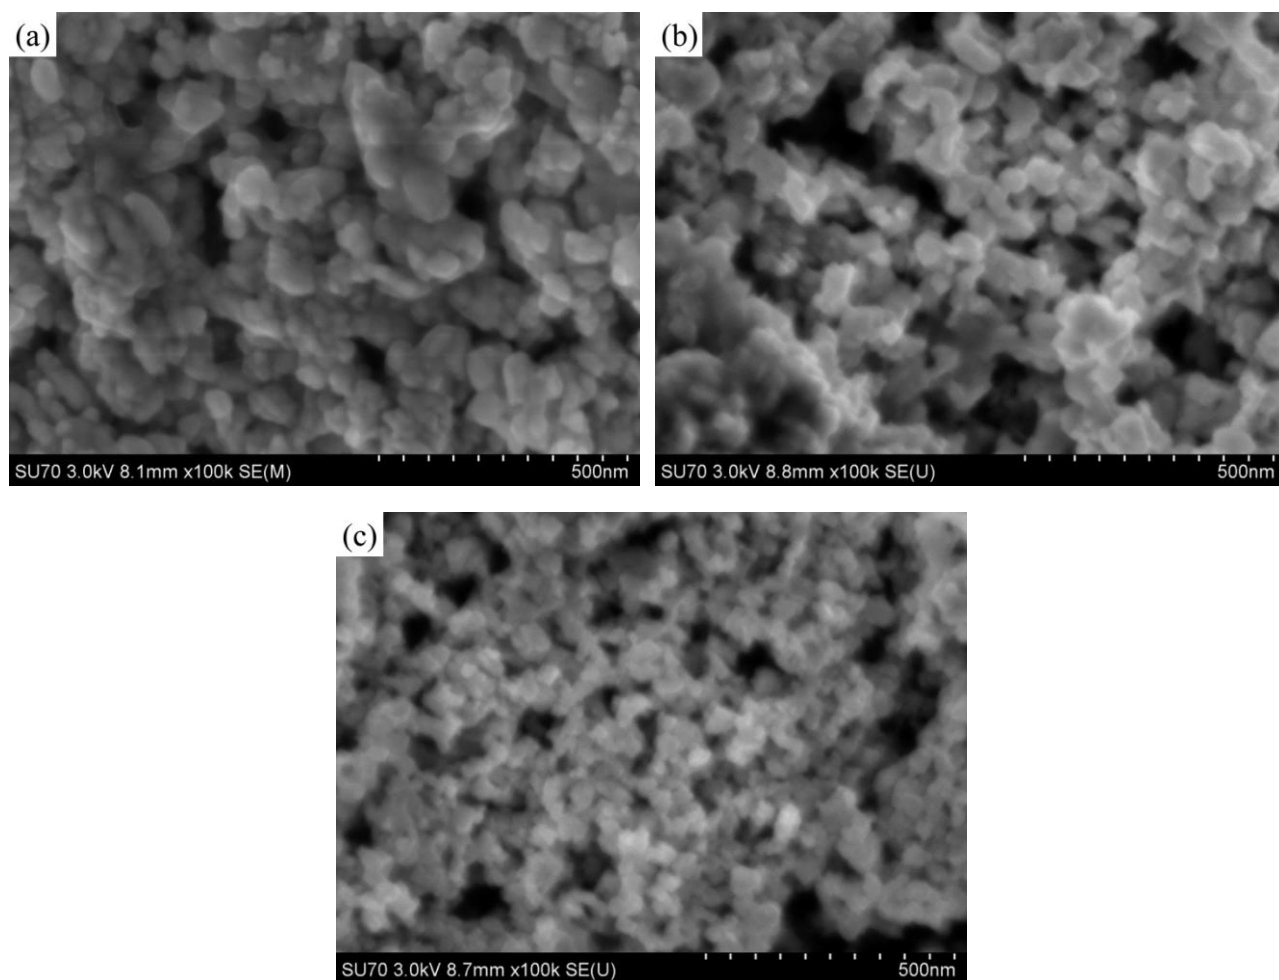

Figure S3. SEM images of (a)  $a\text{-NbH}_x$ , (b)  $b\text{-NbH}_x$  and (c)  $c\text{-NbH}_x$  powders.

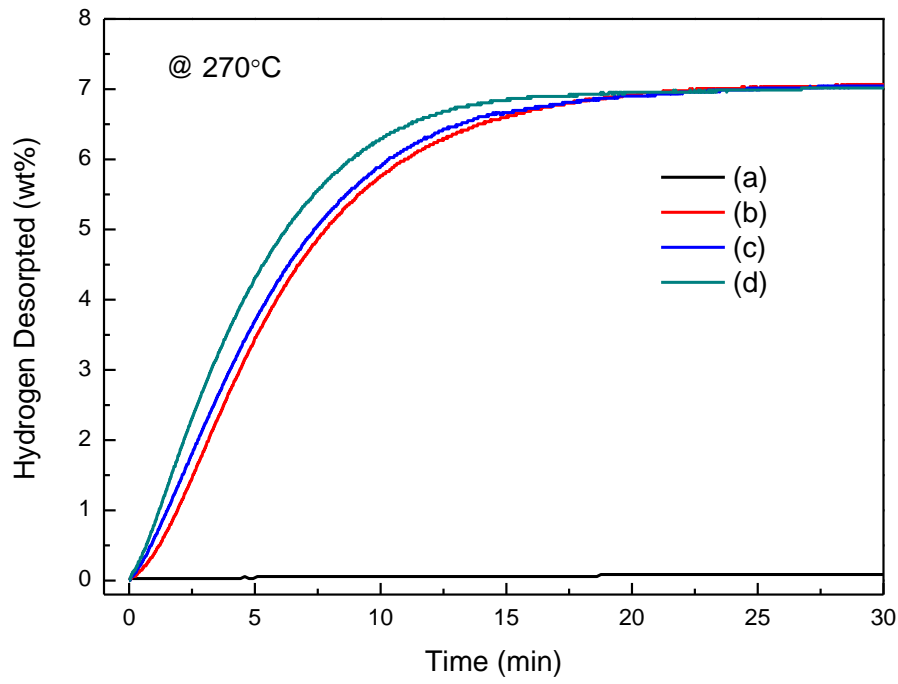

Figure S4. Isothermal desorption curves of (a) BM  $\text{MgH}_2$ , (b)  $\text{MgH}_2/a\text{-NbH}_x$ , (c)  $\text{MgH}_2/b\text{-NbH}_x$  and (d)  $\text{MgH}_2/c\text{-NbH}_x$  samples under 3 kPa hydrogen back pressure at 270 °C.

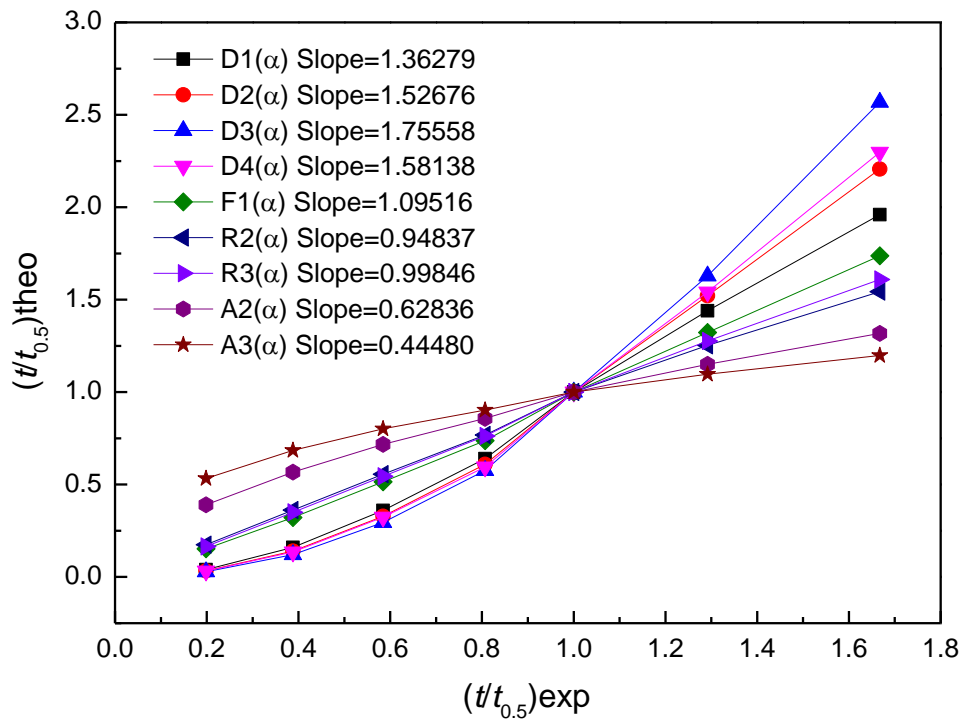

Figure S5.  $(t/t_{0.5})_{\text{theo}}$  vs  $(t/t_{0.5})_{\text{exp}}$  of  $\text{MgH}_2/c\text{-NbH}_x$  composite for various kinetic models.

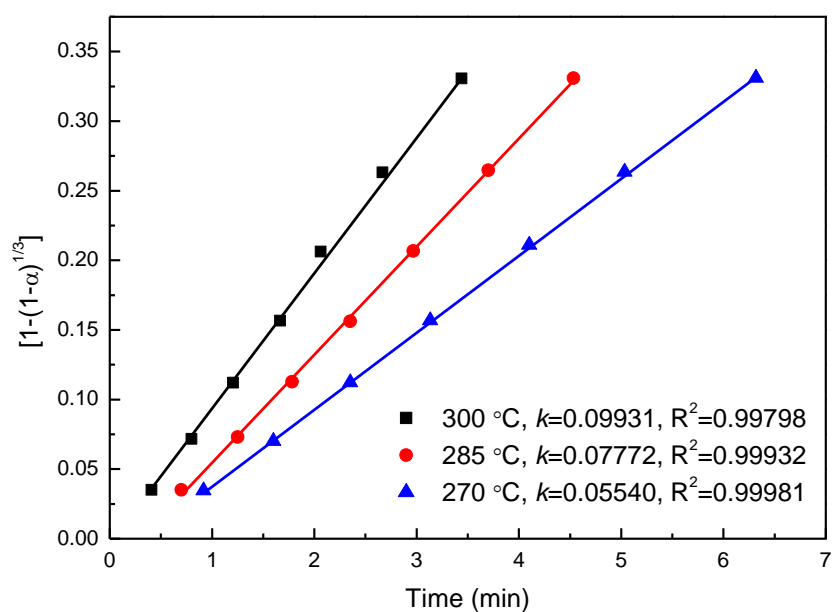

Figure S6. Time dependence of  $f(\alpha)$  of  $\text{MgH}_2/\text{c-NbH}_x$  composite for various temperatures.

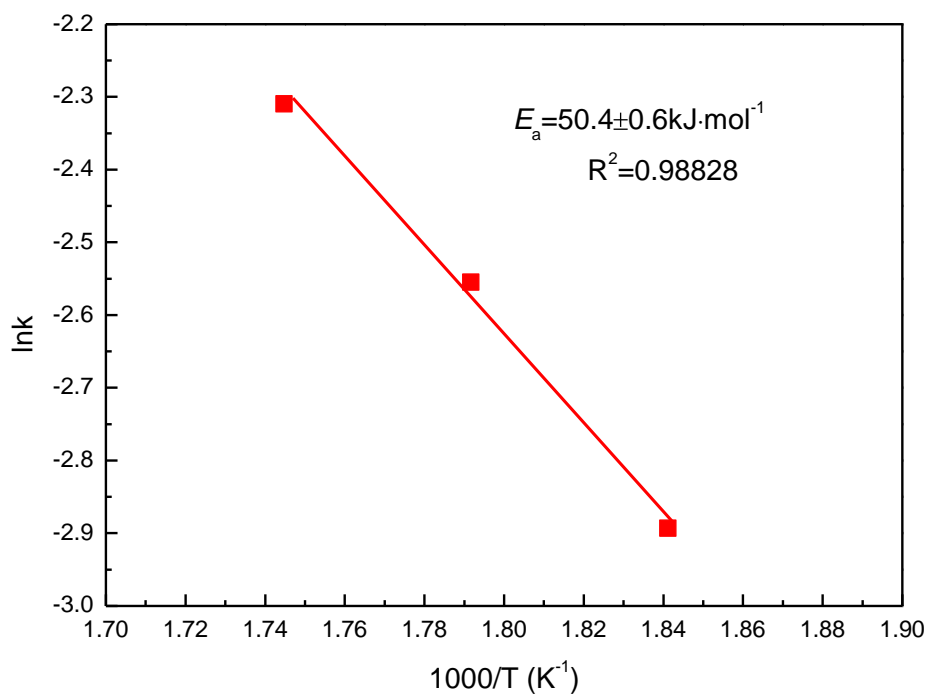

Figure S7. Arrhenius plots for the dehydrogenation of  $\text{MgH}_2/\text{c-NbH}_x$  composite.

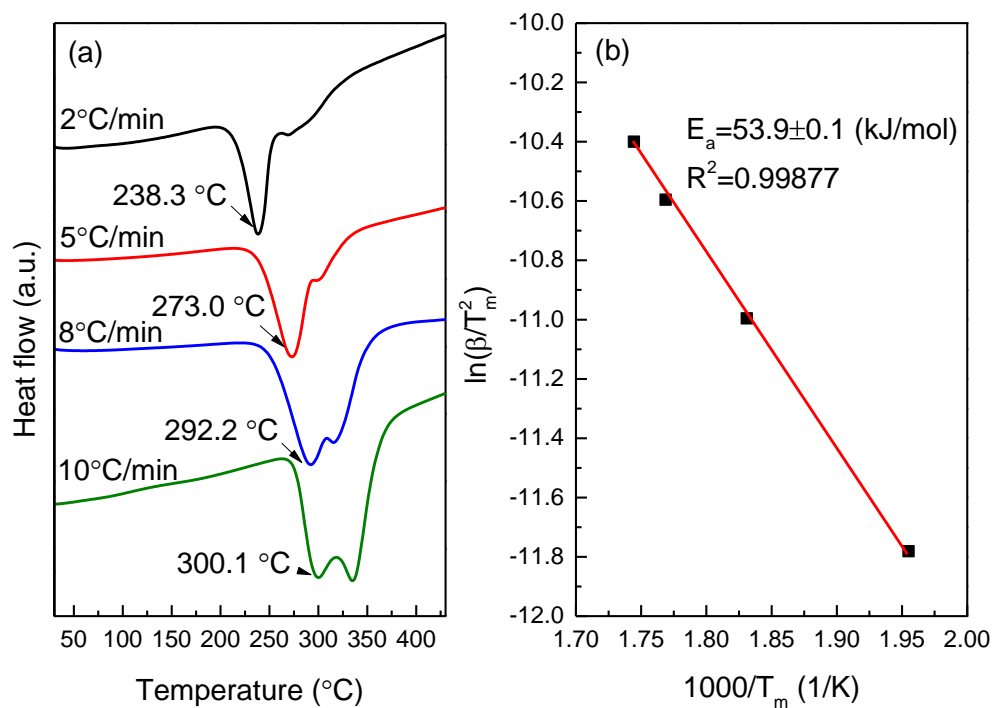

Figure S8. DSC curves (a) of  $\text{MgH}_2/\text{c-NbH}_x$  composite at various heating rates and the corresponding Estimation of the apparent activation energy (b) using Kissinger's method with the parameters obtained from DSC measurements.

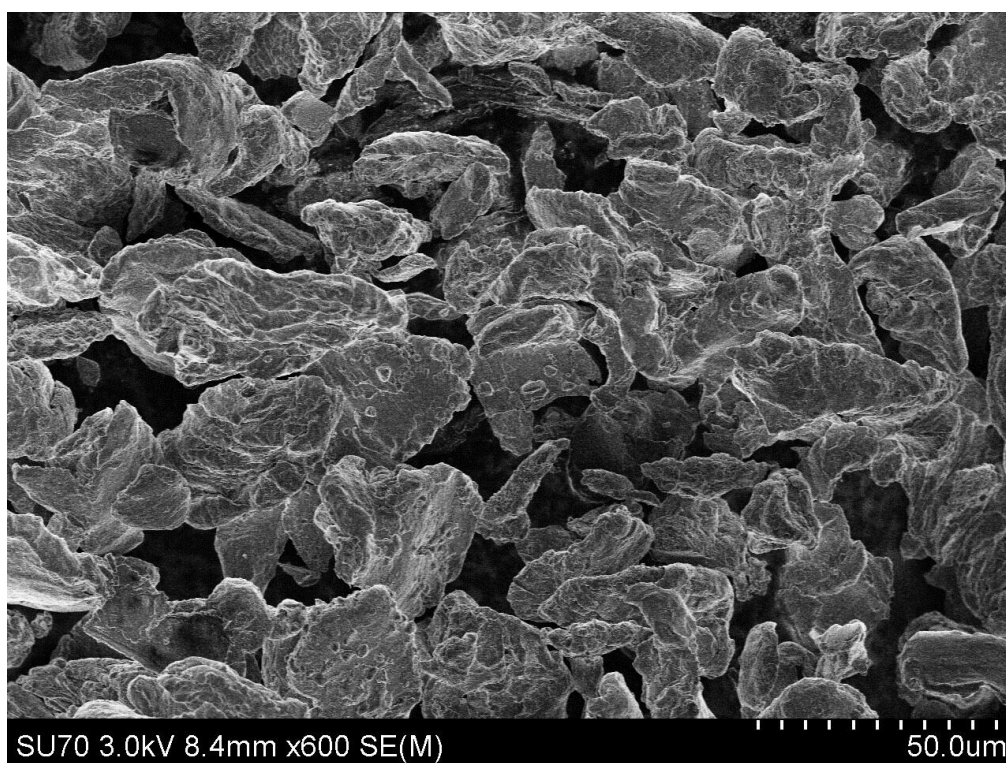

Figure S9. SEM image of as-received MgH<sub>2</sub>.

- (1) Ding, J.; Miao, W. F.; McCormick, P. G.; Street, R. Mechanochemical Synthesis of Ultrafine Fe Powder. *Appl. Phys. Lett.* **1995**, *67*, 3804-3806.
- (2) Brinks, H. W.; Istad-Lem, A.; Hauback, B. C. Mechanochemical Synthesis and Crystal Structure of  $\alpha'$ -AlD<sub>3</sub> and  $\alpha$ -AlD<sub>3</sub>. *J. Phys. Chem. B* **2006**, *110*, 25833-25837.
- (3) Sheppard, D. A.; Paskevicius, M.; Buckley, C. E. The Mechanochemical Synthesis of Magnesium Hydride Nanoparticles. *J. Alloy Compd.* **2010**, *492*, L72-L74.
- (4) Paskevicius, M.; Sheppard, D. A.; Buckley, C. E. Thermodynamic Changes in Mechanochemically Synthesized Magnesium Hydride Nanoparticles. *J. Am. Chem. Soc.* **2010**, *132*, 5077-5083.
